# Supplementary material
Source: ML conference proceedings conference paper supplement (https://aclanthology.org/D19-1277)

# Deep Contextualized Word Embeddings in Transition-Based and Graph-Based Dependency Parsing – A Tale of Two Parsers Revisited

## Supplementary Material

Artur Kulmizev Miryam de Lhoneux Johannes Gontrum Elena Fano Joakim Nivre

Department of Linguistics and Philology, Uppsala University

{artur.kulmizev,miryam.de.lhoneux,joakim.nivre}@lingfil.uu.se

{johannes.gontrum.4608,elena.fano.3249}@student.uu.se

### A Hyperparameters

| Component              | Specification                     |
|------------------------|-----------------------------------|
| $w_k$ dim.             | 500 (100 * 2 (char) + 300 (word)) |
| ELMo <sub>k</sub> dim. | 1024                              |
| BERT <sub>k</sub> dim. | 768                               |
| BiLSTM output dim.     | 125                               |
| MLP output dim.        | 100                               |
| No. BiLSTM layers      | 2                                 |
| BiLSTM dropout rate    | 0.33                              |
| No. training epochs    | 30                                |
| Model selection        | best dev. performance             |

### B Error Analysis

#### B.1 Dependency Length

|      | GR   |      | GR+B |      | GR+E |      | TR   |      | TR+B |      | TR+E |      |
|------|------|------|------|------|------|------|------|------|------|------|------|------|
|      | pr   | rc   |
| root | 0.91 | 0.91 | 0.92 | 0.92 | 0.92 | 0.92 | 0.88 | 0.88 | 0.91 | 0.91 | 0.90 | 0.90 |
| 1    | 0.89 | 0.90 | 0.90 | 0.91 | 0.90 | 0.91 | 0.88 | 0.90 | 0.90 | 0.91 | 0.90 | 0.92 |
| 2    | 0.83 | 0.84 | 0.85 | 0.86 | 0.86 | 0.86 | 0.82 | 0.83 | 0.86 | 0.86 | 0.85 | 0.86 |
| 3    | 0.76 | 0.77 | 0.80 | 0.80 | 0.80 | 0.80 | 0.76 | 0.75 | 0.81 | 0.80 | 0.80 | 0.80 |
| 4    | 0.74 | 0.72 | 0.78 | 0.77 | 0.77 | 0.76 | 0.73 | 0.70 | 0.78 | 0.76 | 0.78 | 0.76 |
| 5    | 0.70 | 0.67 | 0.74 | 0.72 | 0.73 | 0.71 | 0.67 | 0.64 | 0.74 | 0.71 | 0.73 | 0.71 |
| 6    | 0.68 | 0.66 | 0.73 | 0.72 | 0.72 | 0.70 | 0.65 | 0.63 | 0.73 | 0.72 | 0.70 | 0.69 |
| 7    | 0.66 | 0.64 | 0.72 | 0.70 | 0.70 | 0.69 | 0.64 | 0.61 | 0.72 | 0.71 | 0.68 | 0.67 |
| 8    | 0.65 | 0.61 | 0.71 | 0.67 | 0.70 | 0.66 | 0.63 | 0.58 | 0.71 | 0.67 | 0.68 | 0.64 |
| 9    | 0.66 | 0.64 | 0.71 | 0.72 | 0.69 | 0.70 | 0.64 | 0.63 | 0.71 | 0.70 | 0.68 | 0.67 |
| >=10 | 0.69 | 0.66 | 0.73 | 0.71 | 0.71 | 0.69 | 0.65 | 0.63 | 0.72 | 0.71 | 0.70 | 0.68 |

## B.2 Distance to Root

|      | GR   |      | GR+B |      | GR+E |      | TR   |      | TR+B |      | TR+E |      |
|------|------|------|------|------|------|------|------|------|------|------|------|------|
|      | pr   | rc   |
| 0    | 0.91 | 0.91 | 0.92 | 0.92 | 0.92 | 0.92 | 0.88 | 0.88 | 0.91 | 0.91 | 0.90 | 0.90 |
| 1    | 0.83 | 0.81 | 0.85 | 0.84 | 0.85 | 0.84 | 0.81 | 0.80 | 0.85 | 0.84 | 0.84 | 0.83 |
| 2    | 0.81 | 0.82 | 0.84 | 0.85 | 0.84 | 0.84 | 0.81 | 0.81 | 0.84 | 0.85 | 0.84 | 0.84 |
| 3    | 0.81 | 0.82 | 0.85 | 0.85 | 0.84 | 0.84 | 0.81 | 0.81 | 0.85 | 0.85 | 0.84 | 0.84 |
| 4    | 0.82 | 0.82 | 0.85 | 0.85 | 0.84 | 0.84 | 0.81 | 0.82 | 0.85 | 0.85 | 0.85 | 0.85 |
| 5    | 0.82 | 0.83 | 0.85 | 0.86 | 0.84 | 0.85 | 0.81 | 0.83 | 0.85 | 0.86 | 0.84 | 0.85 |
| 6    | 0.82 | 0.83 | 0.84 | 0.86 | 0.84 | 0.85 | 0.82 | 0.83 | 0.85 | 0.86 | 0.84 | 0.85 |
| 7    | 0.82 | 0.83 | 0.85 | 0.86 | 0.85 | 0.85 | 0.81 | 0.83 | 0.85 | 0.86 | 0.85 | 0.85 |
| 8    | 0.82 | 0.84 | 0.83 | 0.85 | 0.84 | 0.84 | 0.81 | 0.83 | 0.84 | 0.85 | 0.85 | 0.85 |
| 9    | 0.83 | 0.81 | 0.83 | 0.82 | 0.84 | 0.83 | 0.79 | 0.81 | 0.84 | 0.83 | 0.83 | 0.82 |
| >=10 | 0.81 | 0.84 | 0.84 | 0.85 | 0.85 | 0.87 | 0.80 | 0.84 | 0.83 | 0.85 | 0.83 | 0.87 |

## B.3 Projectivity

|          | GR   |      | GR+B |      | GR+E |      | TR   |      | TR+B |      | TR+E |      |
|----------|------|------|------|------|------|------|------|------|------|------|------|------|
|          | pr   | rc   |
| Non-proj | 0.35 | 0.43 | 0.36 | 0.45 | 0.36 | 0.45 | 0.48 | 0.33 | 0.49 | 0.37 | 0.52 | 0.40 |
| Proj     | 0.83 | 0.83 | 0.86 | 0.85 | 0.85 | 0.85 | 0.81 | 0.82 | 0.85 | 0.85 | 0.85 | 0.85 |

## B.4 Part of Speech

|       | GR   | GR+B | GR+E | TR   | TR+B | TR+E |
|-------|------|------|------|------|------|------|
| ADJ   | 0.82 | 0.85 | 0.85 | 0.82 | 0.85 | 0.85 |
| ADP   | 0.95 | 0.96 | 0.96 | 0.95 | 0.96 | 0.96 |
| ADV   | 0.78 | 0.80 | 0.80 | 0.77 | 0.80 | 0.81 |
| AUX   | 0.93 | 0.93 | 0.94 | 0.92 | 0.93 | 0.94 |
| CCONJ | 0.85 | 0.88 | 0.87 | 0.84 | 0.87 | 0.86 |
| DET   | 0.94 | 0.95 | 0.95 | 0.94 | 0.95 | 0.95 |
| INTJ  | 0.50 | 0.44 | 0.48 | 0.44 | 0.45 | 0.48 |
| NOUN  | 0.77 | 0.81 | 0.80 | 0.76 | 0.80 | 0.80 |
| NUM   | 0.83 | 0.84 | 0.84 | 0.82 | 0.84 | 0.84 |
| PART  | 0.86 | 0.89 | 0.87 | 0.84 | 0.90 | 0.88 |
| PRON  | 0.83 | 0.85 | 0.86 | 0.82 | 0.85 | 0.86 |
| PROPN | 0.79 | 0.84 | 0.82 | 0.78 | 0.84 | 0.83 |
| PUNCT | 0.82 | 0.85 | 0.84 | 0.81 | 0.86 | 0.84 |
| SCONJ | 0.90 | 0.93 | 0.93 | 0.89 | 0.93 | 0.93 |
| SYM   | 0.85 | 0.84 | 0.84 | 0.82 | 0.85 | 0.86 |
| VERB  | 0.76 | 0.80 | 0.79 | 0.74 | 0.79 | 0.78 |
| X     | 0.64 | 0.67 | 0.65 | 0.64 | 0.68 | 0.67 |

## B.5 Dependency Relation

|            | GR   |      | GR+B |      | GR+E |      | TR   |      | TR+B |      | TR+E |      |
|------------|------|------|------|------|------|------|------|------|------|------|------|------|
|            | pr   | rc   |
| acl        | 0.69 | 0.69 | 0.75 | 0.76 | 0.73 | 0.73 | 0.66 | 0.66 | 0.75 | 0.75 | 0.73 | 0.73 |
| advcl      | 0.68 | 0.69 | 0.68 | 0.71 | 0.70 | 0.72 | 0.66 | 0.67 | 0.69 | 0.71 | 0.70 | 0.71 |
| advmod     | 0.77 | 0.77 | 0.79 | 0.78 | 0.80 | 0.79 | 0.76 | 0.76 | 0.79 | 0.80 | 0.80 | 0.80 |
| amod       | 0.86 | 0.87 | 0.88 | 0.89 | 0.89 | 0.90 | 0.85 | 0.87 | 0.88 | 0.89 | 0.88 | 0.90 |
| appos      | 0.55 | 0.54 | 0.61 | 0.63 | 0.59 | 0.60 | 0.54 | 0.57 | 0.62 | 0.64 | 0.59 | 0.61 |
| aux        | 0.95 | 0.95 | 0.95 | 0.95 | 0.96 | 0.96 | 0.95 | 0.95 | 0.95 | 0.95 | 0.96 | 0.96 |
| case       | 0.95 | 0.96 | 0.96 | 0.97 | 0.96 | 0.96 | 0.95 | 0.95 | 0.96 | 0.97 | 0.96 | 0.96 |
| cc         | 0.84 | 0.85 | 0.87 | 0.88 | 0.87 | 0.87 | 0.83 | 0.83 | 0.87 | 0.88 | 0.86 | 0.86 |
| ccomp      | 0.67 | 0.64 | 0.71 | 0.67 | 0.71 | 0.66 | 0.65 | 0.60 | 0.72 | 0.68 | 0.71 | 0.68 |
| clf        | 0.87 | 0.90 | 0.94 | 0.95 | 0.92 | 0.92 | 0.89 | 0.87 | 0.95 | 0.94 | 0.92 | 0.90 |
| compound   | 0.85 | 0.84 | 0.86 | 0.87 | 0.87 | 0.86 | 0.84 | 0.84 | 0.87 | 0.87 | 0.86 | 0.87 |
| conj       | 0.68 | 0.69 | 0.76 | 0.75 | 0.72 | 0.72 | 0.64 | 0.65 | 0.74 | 0.74 | 0.71 | 0.70 |
| cop        | 0.84 | 0.85 | 0.86 | 0.86 | 0.87 | 0.87 | 0.83 | 0.84 | 0.85 | 0.86 | 0.86 | 0.87 |
| csubj      | 0.59 | 0.51 | 0.62 | 0.54 | 0.63 | 0.56 | 0.55 | 0.49 | 0.64 | 0.53 | 0.63 | 0.55 |
| dep        | 0.68 | 0.56 | 0.74 | 0.60 | 0.72 | 0.58 | 0.65 | 0.56 | 0.73 | 0.60 | 0.69 | 0.57 |
| det        | 0.93 | 0.94 | 0.94 | 0.95 | 0.94 | 0.95 | 0.92 | 0.93 | 0.95 | 0.95 | 0.94 | 0.95 |
| discourse  | 0.74 | 0.61 | 0.78 | 0.62 | 0.75 | 0.65 | 0.72 | 0.60 | 0.79 | 0.65 | 0.76 | 0.56 |
| dislocated | 0.40 | 0.32 | 0.43 | 0.32 | 0.44 | 0.39 | 0.28 | 0.26 | 0.34 | 0.36 | 0.35 | 0.44 |
| expl       | 0.75 | 0.81 | 0.79 | 0.82 | 0.79 | 0.81 | 0.75 | 0.79 | 0.79 | 0.83 | 0.81 | 0.82 |
| fixed      | 0.78 | 0.72 | 0.81 | 0.76 | 0.82 | 0.77 | 0.78 | 0.73 | 0.82 | 0.76 | 0.82 | 0.78 |
| flat       | 0.79 | 0.78 | 0.85 | 0.83 | 0.83 | 0.81 | 0.79 | 0.78 | 0.83 | 0.82 | 0.82 | 0.82 |
| goeswith   | 0.71 | 0.44 | 0.92 | 0.31 | 0.68 | 0.44 | 0.61 | 0.28 | 0.84 | 0.41 | 0.75 | 0.46 |
| iobj       | 0.83 | 0.81 | 0.82 | 0.80 | 0.86 | 0.82 | 0.83 | 0.78 | 0.85 | 0.79 | 0.85 | 0.83 |
| list       | 0.31 | 0.28 | 0.32 | 0.32 | 0.38 | 0.33 | 0.28 | 0.23 | 0.34 | 0.33 | 0.41 | 0.36 |
| mark       | 0.89 | 0.87 | 0.91 | 0.91 | 0.91 | 0.91 | 0.88 | 0.87 | 0.91 | 0.91 | 0.91 | 0.90 |
| nmod       | 0.78 | 0.78 | 0.81 | 0.81 | 0.80 | 0.81 | 0.77 | 0.77 | 0.81 | 0.81 | 0.80 | 0.81 |
| nsubj      | 0.79 | 0.80 | 0.82 | 0.83 | 0.82 | 0.83 | 0.77 | 0.78 | 0.82 | 0.83 | 0.81 | 0.82 |
| nummod     | 0.87 | 0.90 | 0.88 | 0.91 | 0.88 | 0.91 | 0.87 | 0.89 | 0.88 | 0.92 | 0.88 | 0.92 |
| obj        | 0.79 | 0.80 | 0.82 | 0.83 | 0.83 | 0.84 | 0.77 | 0.78 | 0.83 | 0.83 | 0.84 | 0.83 |
| obl        | 0.74 | 0.75 | 0.77 | 0.77 | 0.77 | 0.78 | 0.73 | 0.73 | 0.77 | 0.77 | 0.77 | 0.78 |
| orphan     | 0.29 | 0.11 | 0.31 | 0.12 | 0.35 | 0.11 | 0.21 | 0.10 | 0.35 | 0.13 | 0.38 | 0.15 |
| parataxis  | 0.77 | 0.70 | 0.80 | 0.72 | 0.77 | 0.72 | 0.75 | 0.70 | 0.80 | 0.74 | 0.79 | 0.73 |
| punct      | 0.82 | 0.82 | 0.85 | 0.85 | 0.84 | 0.84 | 0.81 | 0.81 | 0.86 | 0.86 | 0.84 | 0.84 |
| root       | 0.90 | 0.90 | 0.92 | 0.92 | 0.92 | 0.92 | 0.90 | 0.88 | 0.92 | 0.91 | 0.92 | 0.90 |
| vocative   | 0.43 | 0.28 | 0.43 | 0.32 | 0.65 | 0.43 | 0.53 | 0.35 | 0.58 | 0.38 | 0.52 | 0.38 |
| xcomp      | 0.68 | 0.62 | 0.71 | 0.66 | 0.70 | 0.68 | 0.65 | 0.62 | 0.74 | 0.69 | 0.73 | 0.70 |

## B.6 Sentence Length

|       | GR    | GR+B  | GR+E  | TR    | TR+B  | TR+E  |
|-------|-------|-------|-------|-------|-------|-------|
| 1-10  | 83.50 | 83.40 | 84.90 | 81.80 | 83.40 | 84.80 |
| 11-20 | 83.50 | 85.80 | 86.20 | 82.10 | 85.70 | 86.00 |
| 21-30 | 83.00 | 86.20 | 85.50 | 82.00 | 86.10 | 85.10 |
| 31-40 | 81.90 | 85.20 | 84.30 | 81.00 | 84.90 | 84.20 |
| 41-50 | 81.70 | 84.40 | 83.80 | 80.70 | 84.10 | 83.60 |
| 50+   | 78.70 | 81.60 | 81.50 | 78.60 | 82.20 | 81.70 |

## C Per-Language Error Analysis

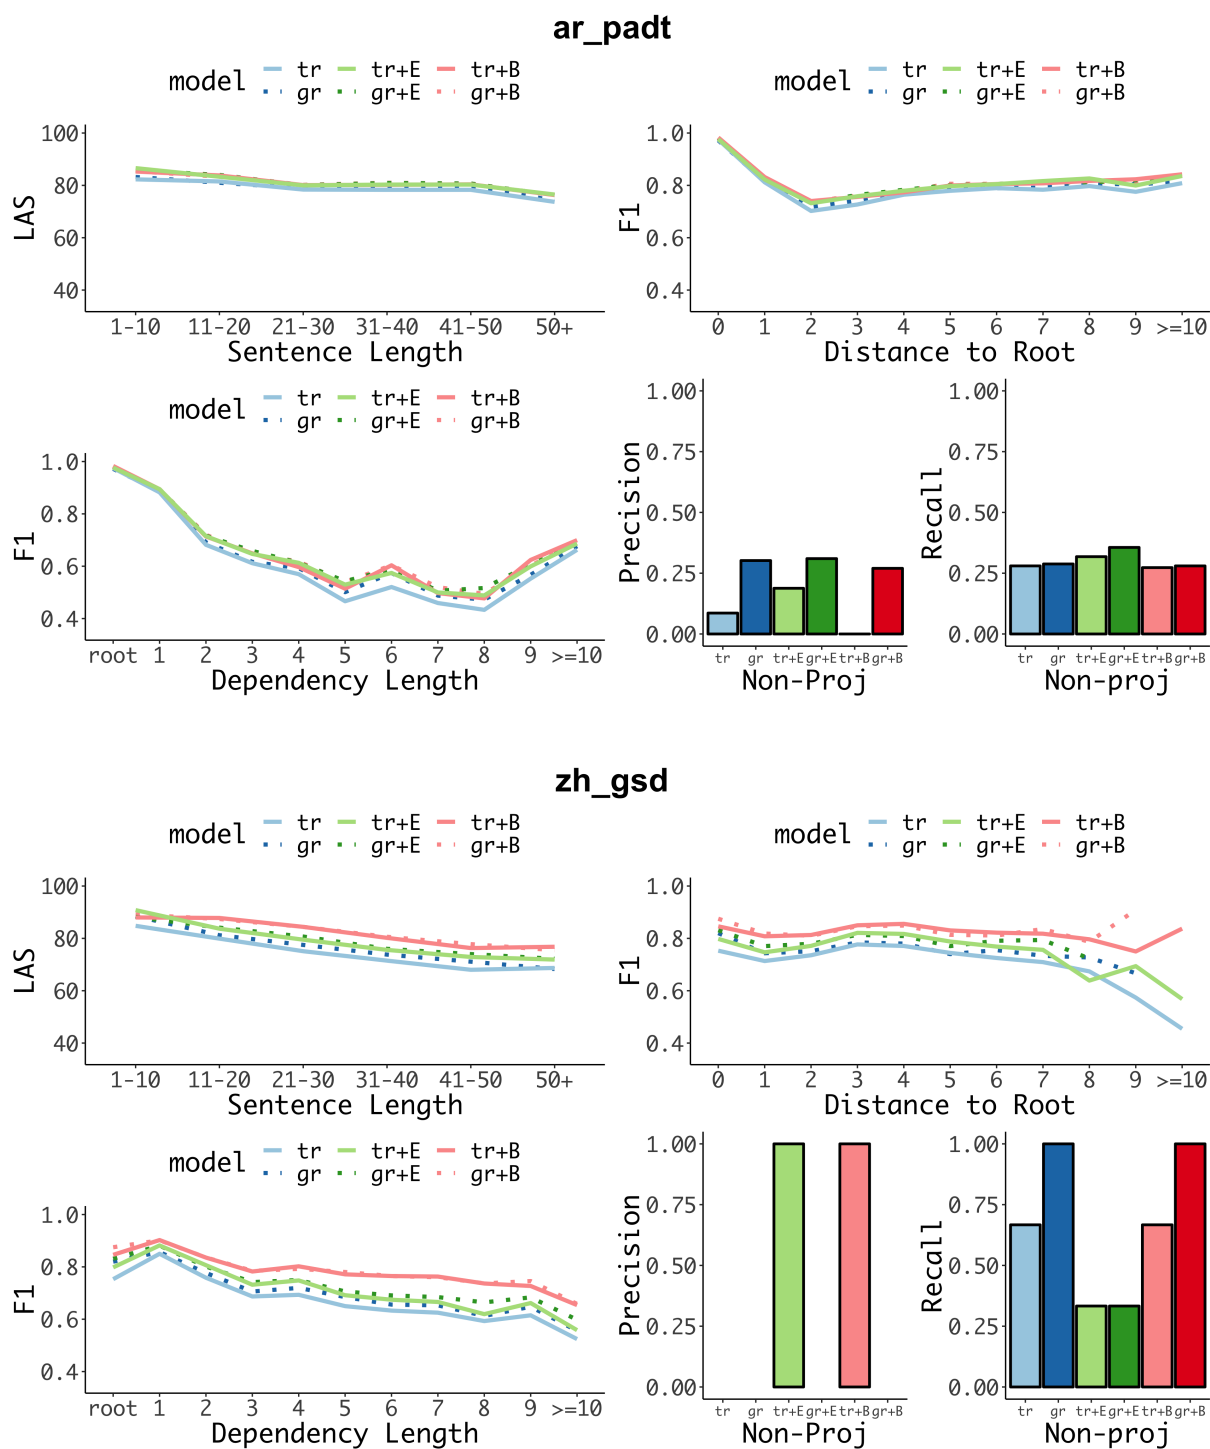

## en\_ewt

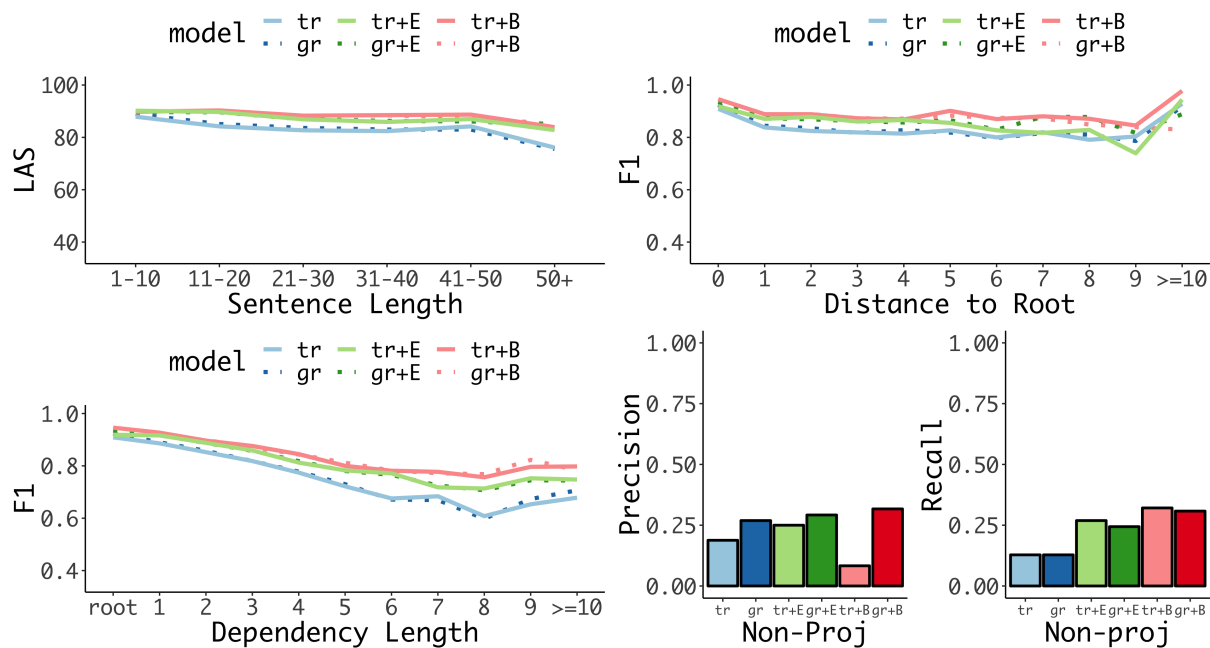

## eu\_bdt

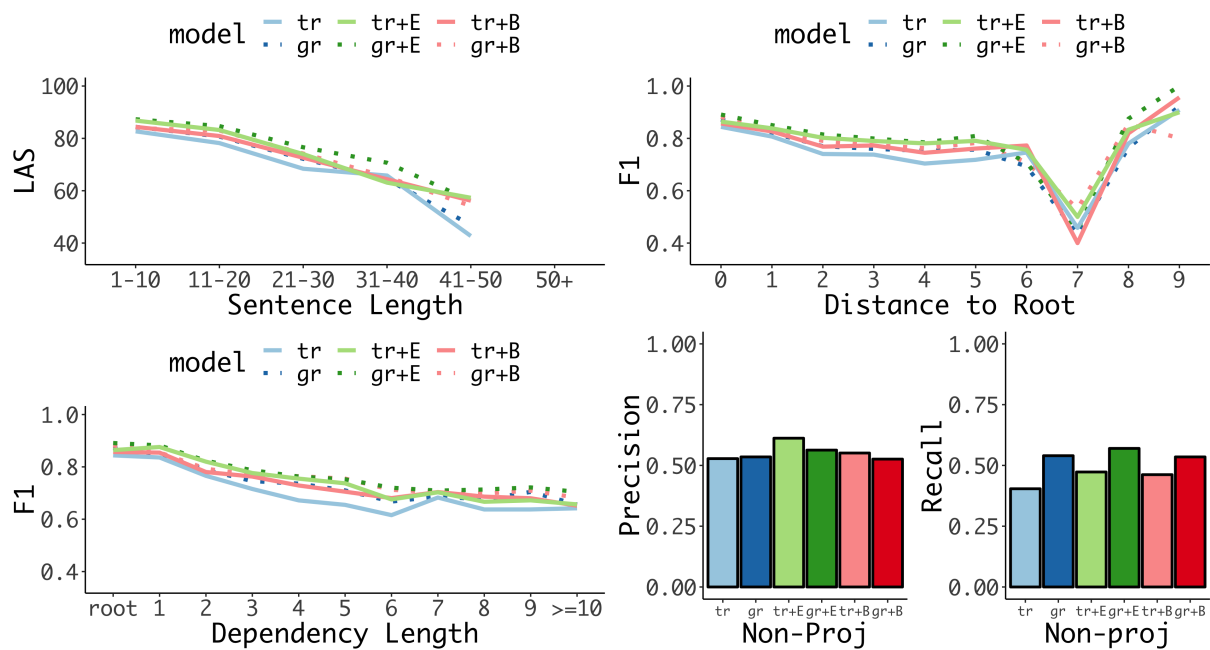

fi\_tdt

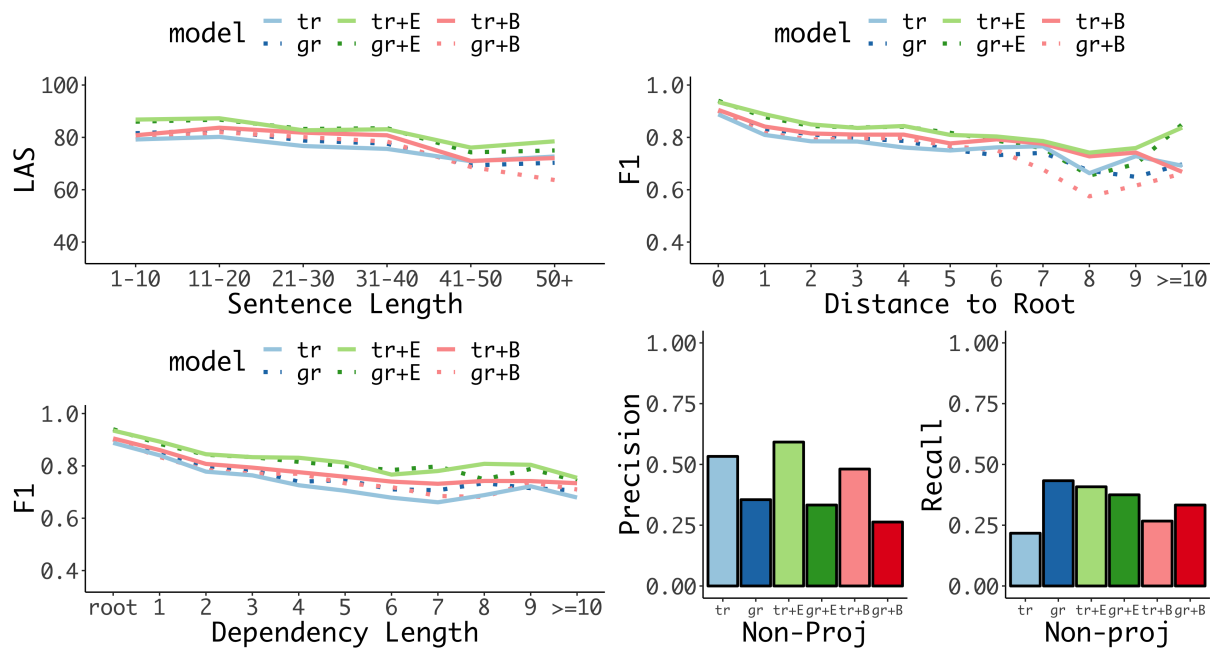

he\_htb

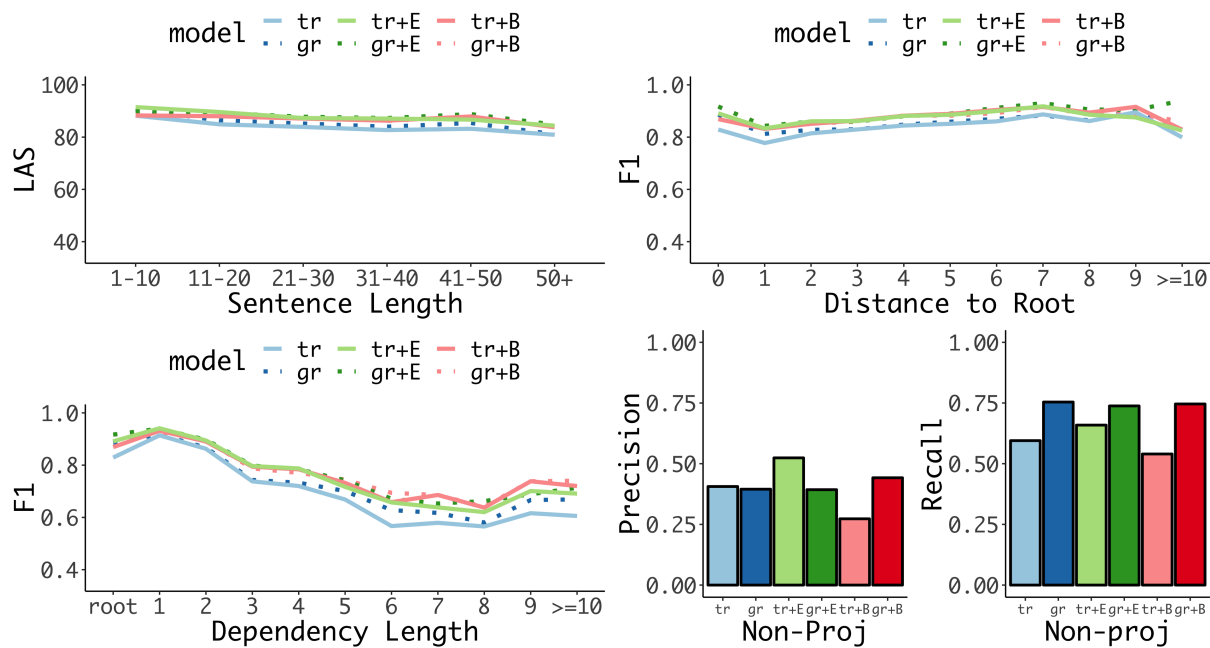

## hi\_hdtb

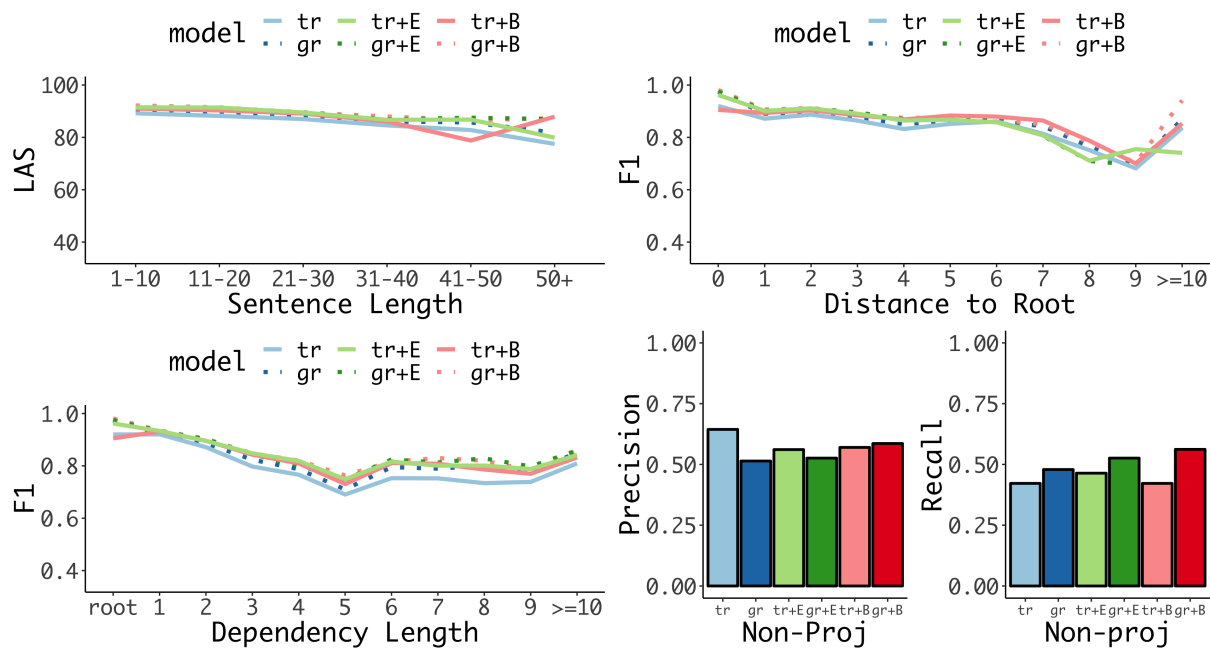

## it\_isdt

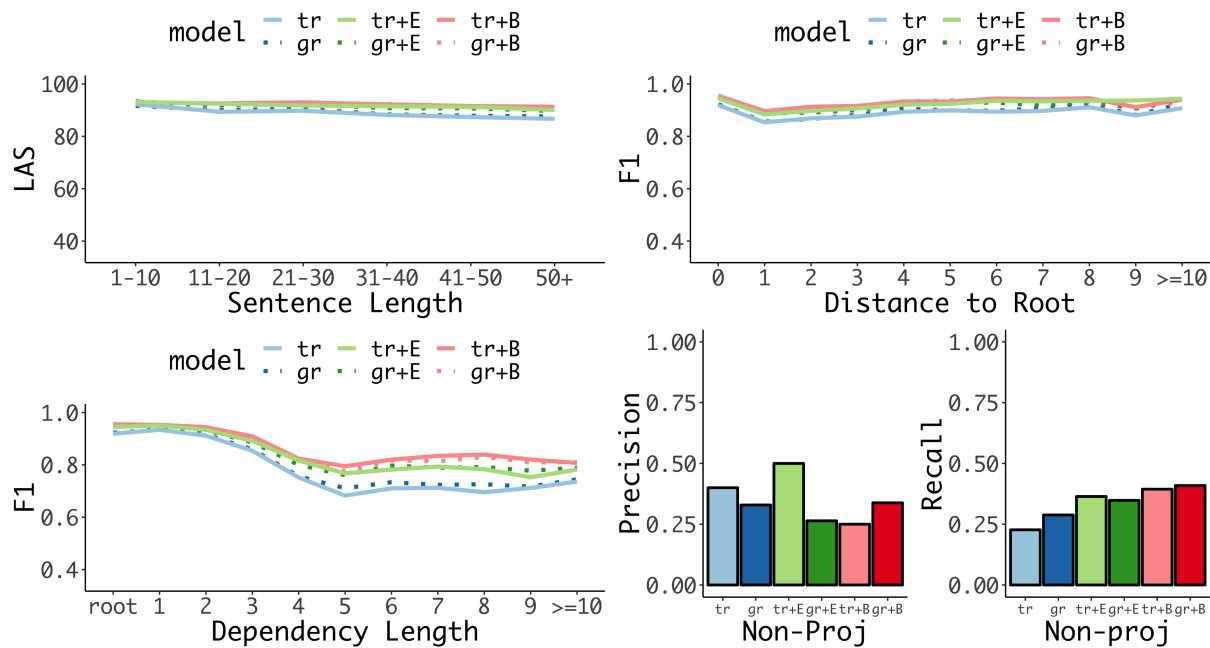



ja\_gsd

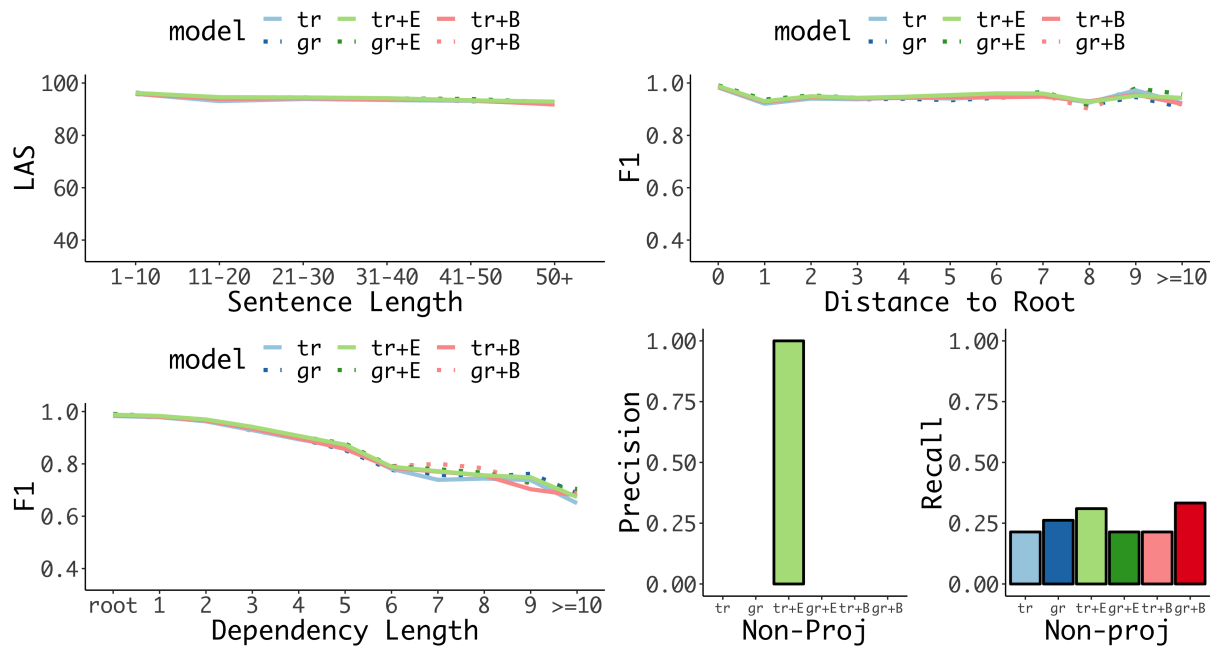

ko\_gsd

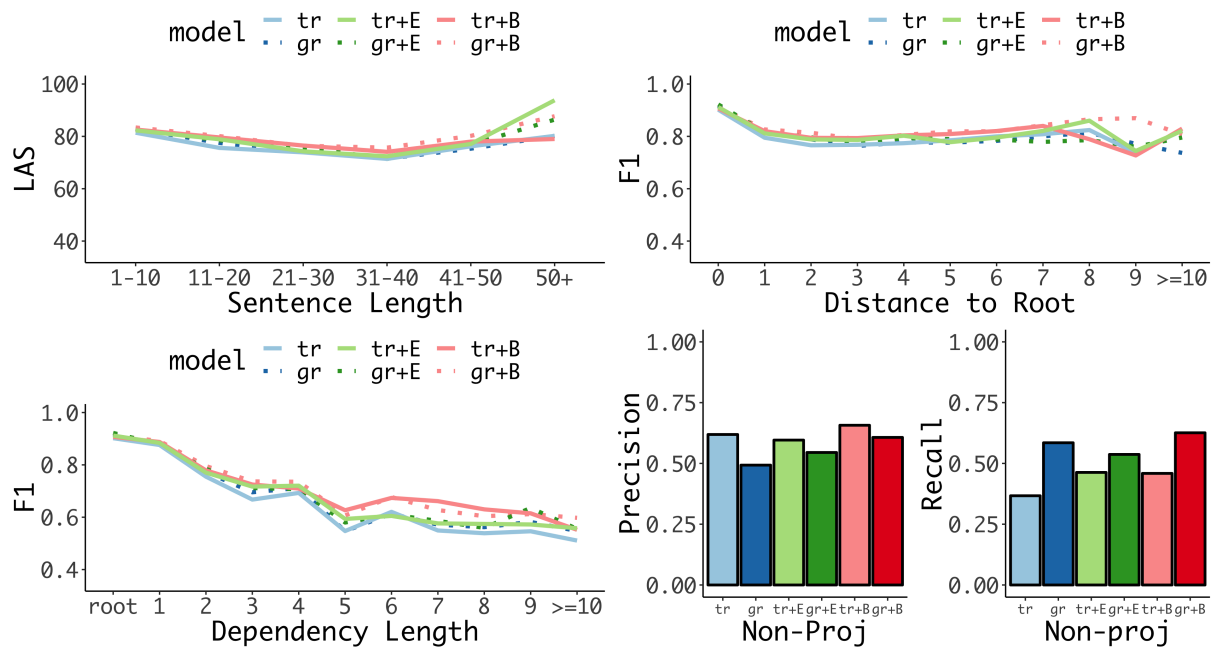

### ru\_syntagrus

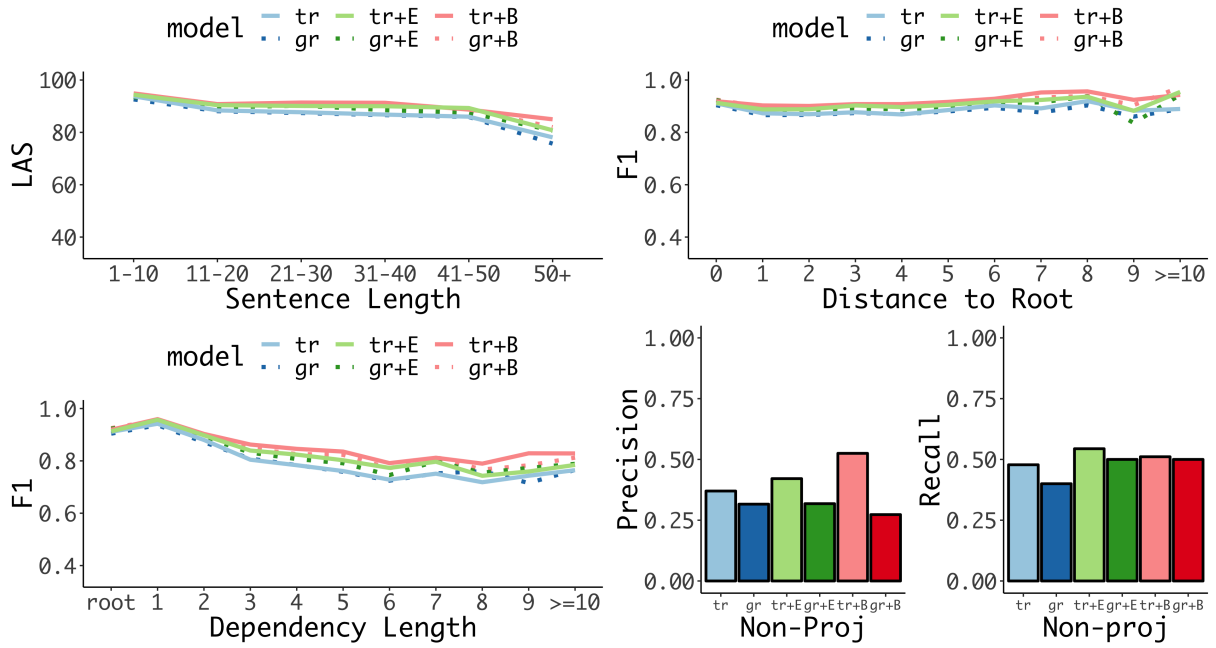

### sv\_talbanken

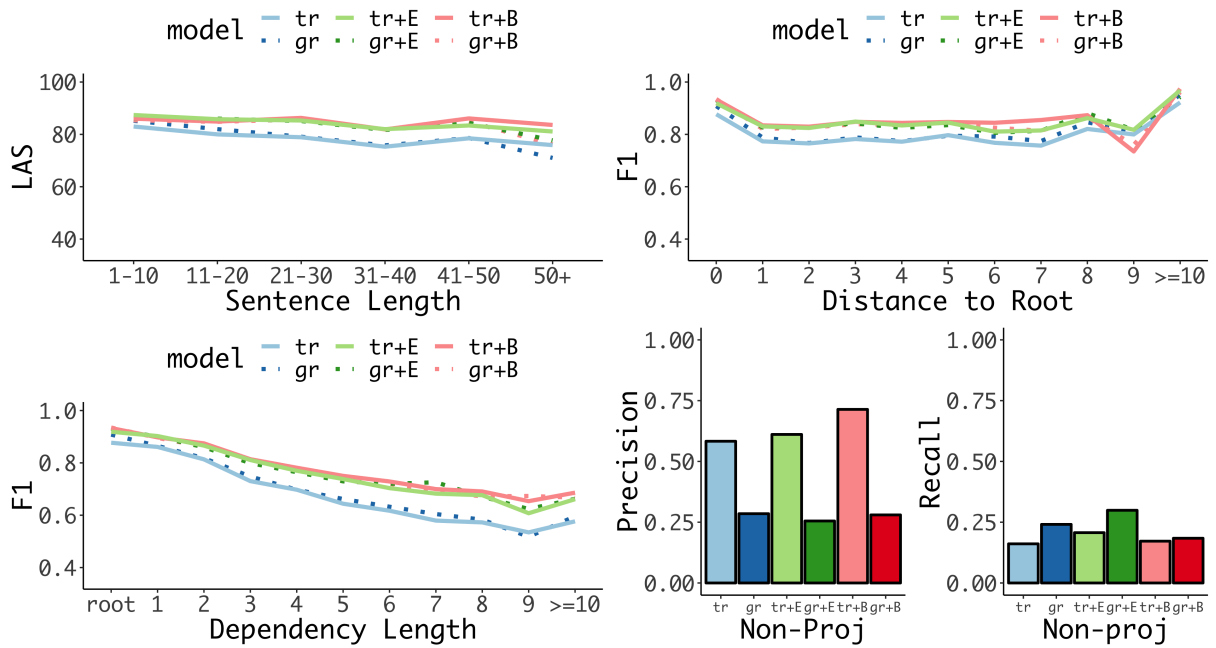

tr\_imst

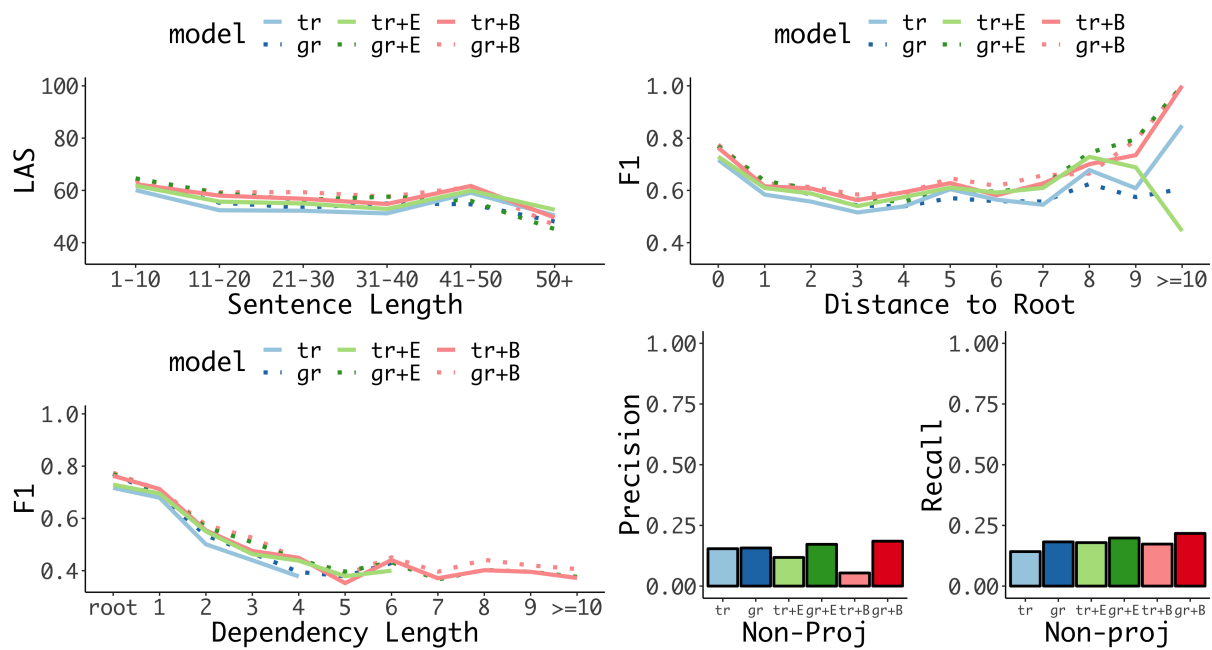

Supplement: Attachment [file appendix.pdf › appendix.pdf]
